# Supplementary material
Source: Springer Nature journal article supplement (https://www.springermedizin.de/resource/supplementary/13075_2011_3545_MOESM4_ESM.pdf/9694546)

**Sedentary Females**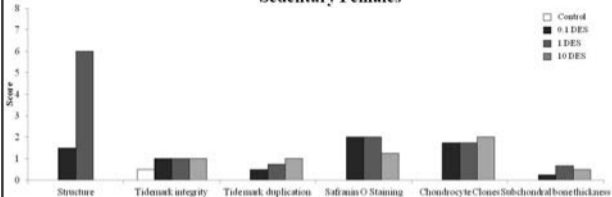**Swim Females**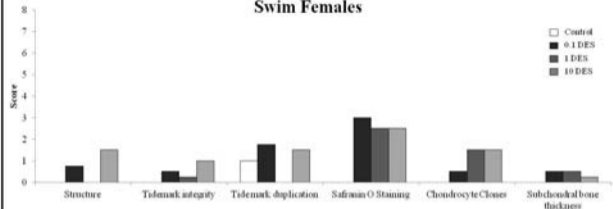**Sedentary Males**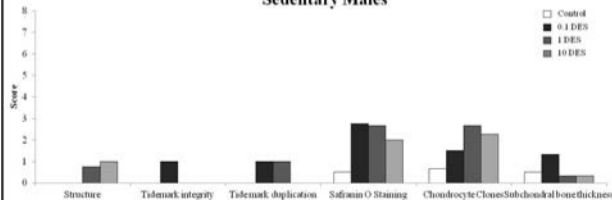**Swims Males**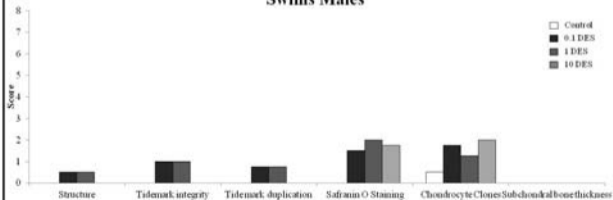

Supplement: MOESM4 [file 9694546]
